# Supplementary material for: Deciphering metabolomics mechanism explaining the role of secondary metabolites as an aid in improving the agronomic traits and tolerance against several stress
Source: Research Square preprint supplement (doi:10.21203/rs.3.rs-4406625/v1), 2024-05-31
Supplement: Supplementary file 1 [file 7aa76c1f5416a6e3ca559d6c.docx]

**Table 1**: Genomic regions and similarities with known clusters

| **Metabolic region** | **Type** | **From** | **To** | **Most similar known cluster** | **Similarity** |
| --- | --- | --- | --- | --- | --- |
| Region 1 | NRPs, TIPKS | 64,076 | 139,868 | Zwitermicin  NRP+ Polyketide | 22% |
| Region 2 | RRE-containing | 323,310 | 344,032 | NA | NA |
| Region 3 | Terpene, NI-siderophore | 490,298 | 518,868 | Schizokinen | 60% |
| Region 4 | Betalactone | 1,223,230 | 1,250,353 | Fengycin  NRP | 53% |
| Region 5 | Terpene | 1,321,080 | 1,342,783 | NA | NA |
| Region 6 | T3PKS | 1,381,043 | 1,422,143 | Micrococcin P1  RiPP Thiopepetide | 8% |
| Region 7 | Betalactone | 1,875,461 | 1,907,712 | NA | NA |
| Region 8 | RiPP-like | 2,720,609 | 2,730,899 | NA | NA |
| Region 9 | Others | 2,764,243 | 2,805,665 | Bacilysin | 85% |
| Region 10 | NRP-metallophore, NRPs | 3,030,569 | 3,079,137 | Bacillibactin/E/baccilibactin  NRP | 80% |
| Region 11 | NRPs, NRP-like | 3,523,387 | 3,607,086 | Lichenysin | 85% |

**Table 2:** List of genes attributed to agronomic traits in the SH-9 genome

NRP, non-ribosomal peptide; TIPKS, type 1 polyketides; T3PKS, type 3 polyketides; RRE, Rev response element; RiPP, ribosomal synthesized and post-translationally modified peptide; NA, not applicable

| **Agronomic traits** | **Genes with PGP potential traits** |
| --- | --- |
| Iron binding | *uxaA, dxs, FadF* |
| Phosphate synthetase | *Dxs, resE, tagF, SasA-1, CarB-1, CarB-2* |
| Abiotic stress tolerance | *Rnr, Sa1A, SrfAB-1, g1tA* |
| RNA nuclease | *rnr, leus, va1S, cdr, resE, Sa1A* |
| DNA nuclease | *YhaN, addB, addA2, ctaD* |
| Biofilm formation | *estA* |
| Glycolipid biosynthesis | *estA* |
| ATP binding | *VAIS, leus, PgPH, cdr, Smc-4, mdtc* |
| Magnesium ion binding | *dos* |
| Phytohormones synthesis | *dxs, Acsa-1* |
| Redox regulation | *Cdr, Rnr, Rese, rapA-5, qoxb, ychF, ggt, cyPB, adhA-2, fhs* |
| Metabolic transporter | *Csbc, YYCB-1, fruA-1, mdtc, YdfJ, CYPB* |
| Stomatal development | *PepF-1* |
| Signaling pathways | *BgIF-1* |
